# Supplementary material for: Understanding thein situstate of lignocellulosic biomass during ionic liquids-based engineering of renewable materials and chemicals
Source: Royal Society of Chemistry journal article supplement (doi:10.1039/d0gc02582h), 2020-01-01
Supplement: d0gc02582h1.pdf [file d0gc02582h1.pdf]

## Supplementary information

### Understanding the in-situ state of lignocellulosic biomass during ionic liquids-based engineering of renewable materials and chemicals

*Kalavathy Rajan<sup>1\*</sup>, Thomas Elder<sup>2</sup>, Nourredine Abdoulmoumine<sup>3</sup>, Danielle Julie Carrier<sup>3</sup> and Nicole Labbé<sup>1\*</sup>*

#### Author affiliations

<sup>1</sup> Center for Renewable Carbon, The University of Tennessee Institute of Agriculture, Knoxville, TN 37996, USA.

<sup>2</sup> USDA-Forest Service, Southern Research Station, Auburn, AL 36849, USA.

<sup>3</sup> Department of Biosystems Engineering & Soil Science, The University of Tennessee Institute of Agriculture, Knoxville, TN 37996, USA.

#### \*Corresponding authors

#### Table of contents

**Table S1.** NMR chemical shift assignments for lignocellulose .....Page S2

**Figure S1.** 2D-HSQC NMR spectra of IL-pretreated Miscanthus lignin .....Page S4

**Table S1** NMR chemical shift assignments for lignocellulose-derived structures

| Component origin     | Specific functional group                                            | Chemical shift (ppm) |
|----------------------|----------------------------------------------------------------------|----------------------|
| <sup>13</sup> C NMR* |                                                                      |                      |
| <b>Lignin</b>        | Aldehyde/ketone (C=O)                                                | 220–187              |
|                      | –COO/CH <sub>3</sub> COO                                             | 173                  |
|                      | Aromatic C—O (G <sub>3(e)</sub> and G <sub>3(ne)</sub> )             | 153–147              |
|                      | Aromatic C—O (G <sub>4(e)</sub> and G <sub>4(ne)</sub> )             | 147–143              |
|                      | Aromatic C—C (G <sub>1(e)</sub> )                                    | 137–134              |
|                      | Aromatic C—C (G <sub>1(ne)</sub> )                                   | 131                  |
|                      | Aromatic C—H (G <sub>6</sub> )                                       | 120                  |
|                      | Aromatic CH (G <sub>5</sub> )                                        | 115                  |
|                      | Aromatic CH (G <sub>2</sub> )                                        | 112                  |
| <b>Hemicellulose</b> | OCHO of (C <sub>1</sub> )                                            | 109–97               |
| <b>Cellulose</b>     | OCHO of (C <sub>1</sub> )                                            | 105                  |
|                      | CHOH of (C <sub>4</sub> )                                            | 89                   |
|                      | CHOH of (amorphous C <sub>4</sub> )                                  | 84                   |
| <b>Lignin</b>        | C <sub>β</sub> -OR                                                   | 86–82                |
| <b>Hemicellulose</b> | Arabinan CHOH of (C <sub>2</sub> , C <sub>3</sub> , C <sub>4</sub> ) | 86–80                |
|                      | Xylan CHOH of (C <sub>2</sub> , C <sub>3</sub> , C <sub>4</sub> )    | 80–73                |
| <b>Cellulose</b>     | CHOH of (C <sub>2</sub> , C <sub>3</sub> , C <sub>5</sub> )          | 75                   |
| <b>Lignin</b>        | C <sub>α</sub> -OR of lignin                                         | 76–72                |
| <b>Cellulose</b>     | CHOH of (C <sub>2</sub> , C <sub>3</sub> , C <sub>5</sub> )          | 72                   |
|                      | CH <sub>2</sub> OH of (crystalline C <sub>6</sub> )                  | 66                   |
|                      | CH <sub>2</sub> OH of (amorphous C <sub>6</sub> )                    | 63                   |
| <b>Hemicellulose</b> | CH <sub>2</sub> OH of (amorphous C <sub>5</sub> )                    | 63–61                |
| <b>Lignin</b>        | C <sub>γ</sub> —OR                                                   | 64–60                |
|                      | OCH <sub>3</sub>                                                     | 56                   |
|                      | α, β methylene groups                                                | 29–31                |
| <b>Hemicellulose</b> | CH <sub>3</sub>                                                      | 21.6                 |
| <b>Lignin</b>        | γ methyl in <i>n</i> -propyl side chain                              | 15.5                 |

| <sup>1</sup> H NMR*      |                                                                                       |             |
|--------------------------|---------------------------------------------------------------------------------------|-------------|
| <b>Hemicellulose</b>     | OCH <sub>3</sub>                                                                      | 2.2–3.2     |
|                          | CH <sub>2</sub> OH of (amorphous C <sub>5</sub> )                                     | 3.2–3.9     |
|                          | Xylan CHOH of (C <sub>1</sub> , C <sub>2</sub> , C <sub>3</sub> , C <sub>4</sub> )    | 3.2–4.3     |
|                          | Arabinan CHOH of (C <sub>1</sub> , C <sub>2</sub> , C <sub>3</sub> , C <sub>4</sub> ) | 3.6–5.2     |
| <b>Lignin</b>            | H <sub>β</sub> in β–β structure                                                       | 3.2–3.4     |
|                          | Methoxyl proton                                                                       | 3.4–4       |
|                          | H <sub>γ</sub> in β- <i>O</i> -4 aryl ether                                           | 4.1–4.6     |
|                          | H <sub>β</sub> in β- <i>O</i> -4 aryl ether                                           | 4.8         |
|                          | H <sub>β</sub> in benzyl aryl ether                                                   | 5.3–5.8     |
|                          | Aromatic H in syringyl unit                                                           | 6.6         |
|                          | Aromatic H in guaiacyl unit                                                           | 6.7–6.9     |
|                          | Ethylenic and aromatic protons in <i>p</i> -coumaric and ferulic acids                | 7.3–7.6     |
| <sup>31</sup> P NMR#     |                                                                                       |             |
| <b>Lignin/ Cellulose</b> | Aliphatic OH                                                                          | 150.0–145.0 |
| <b>Lignin</b>            | 5-Substituted OH                                                                      | 145.0–141.0 |
|                          | Guaiacyl OH                                                                           | 141.0–138.5 |
|                          | <i>p</i> -Hydroxyphenyl OH                                                            | 138.5–136.5 |
|                          | COOH                                                                                  | 136.0–133.5 |

**Sources:** \*Holtman et al., 2010. DOI: 10.1021/jf101258x; Wen et al., 2010. DOI: 10.1021/jf1032153; #Pu et al., 2011. DOI: 10.1039/C1EE01201K; Balakshin & Capanema, 2015. DOI: 10.1080/02773813.2014.928328; Ben et al., 2018. DOI: 10.3389/fenrg.2018.00013

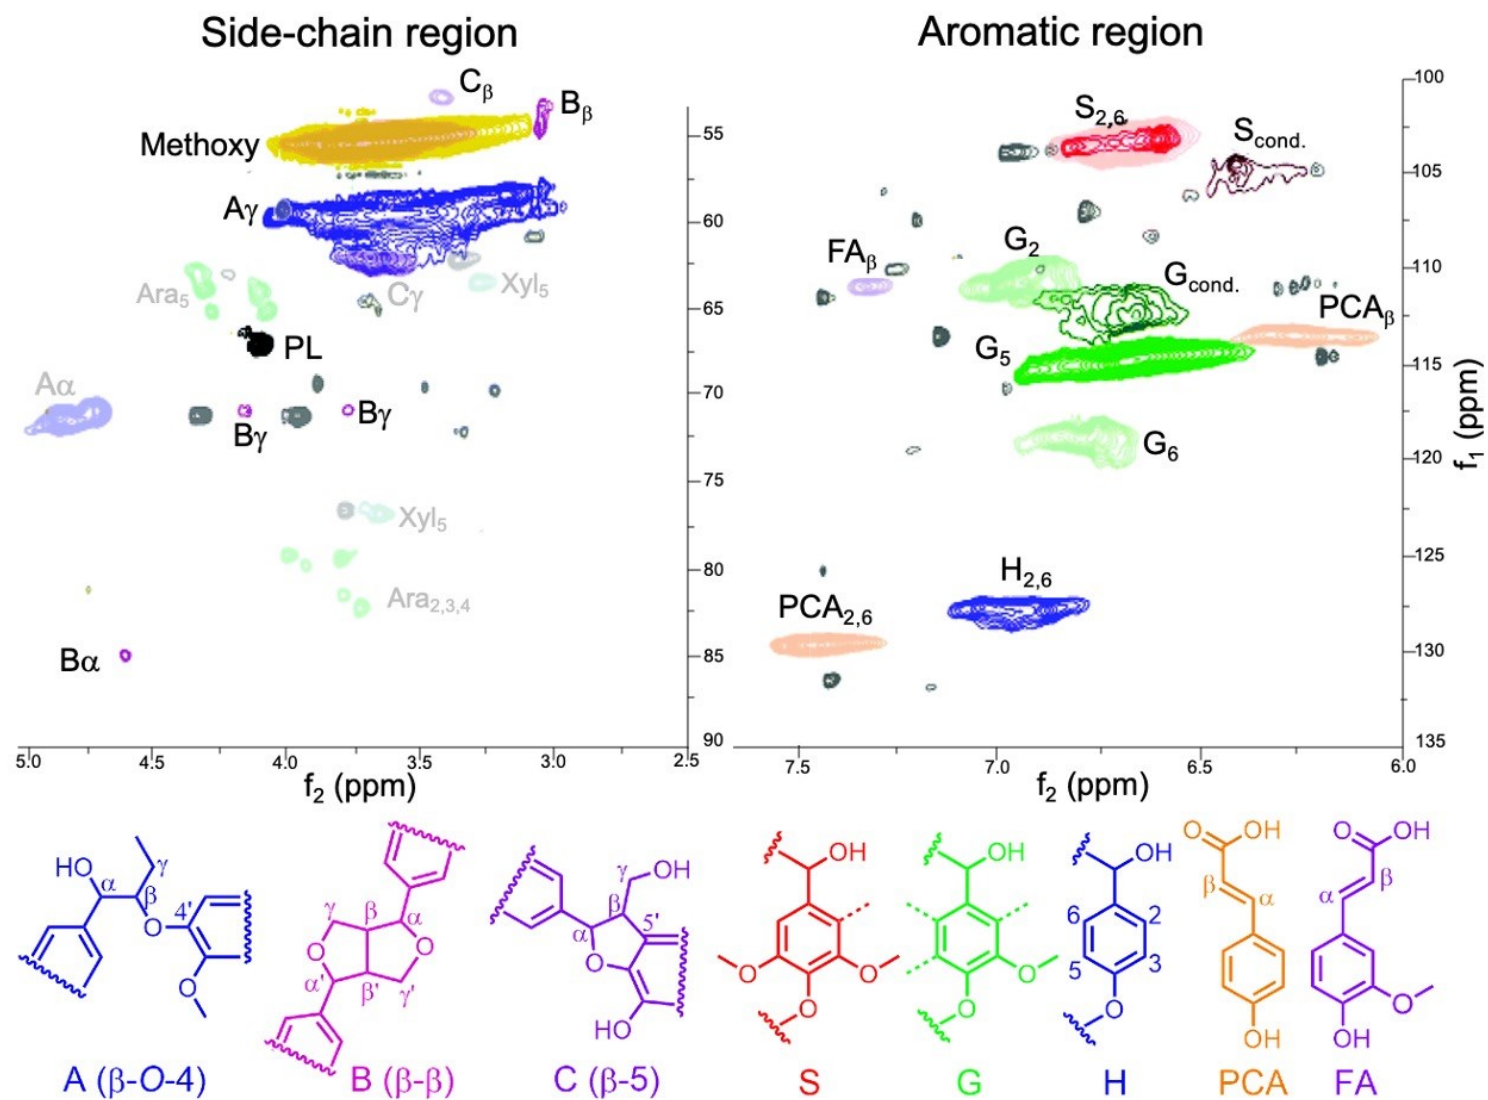

**Fig. S1** 2D-HSQC (heteronuclear single quantum coherence) NMR spectra of *Miscanthus* lignin extracted using 4:1 triethylammonium hydrogen sulfate and water (v/v) at 120 °C for 3 days. Differences between the faded spectra, which was recorded after 1 h, and the darkened spectra, which was recorded after 3 days, elucidate the disappearance of carbohydrate moieties, aryl ether, phenylcoumaran and lignin-carbohydrate sub-unit linkages (PCA, FA), as well as conversion of phenolic sub-units into condensed and demethoxylated (H-lignin) forms (adapted from Brandt-Talbot et al., 2017, DOI: 10.1039/C7GC00705A).
